# Supplementary material
Source: PubMed Central journal article supplement (PMC2628634)

**A.**

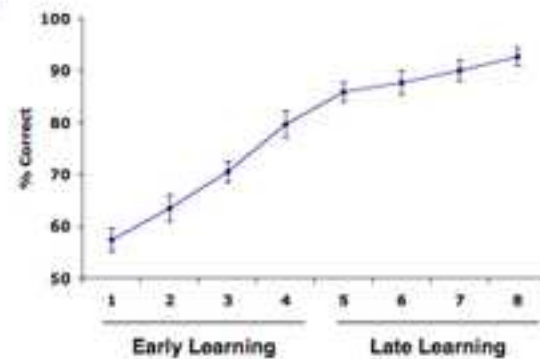

**B.**

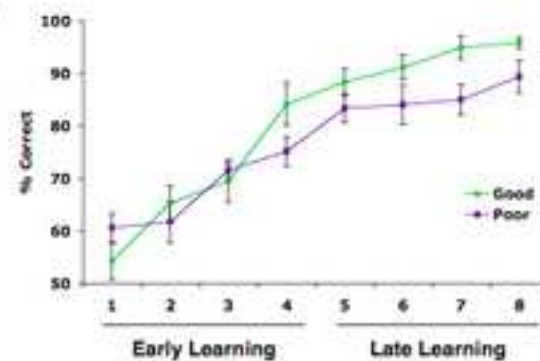

Supplement: NIHMS77093-supplement-01.pdf [file NIHMS77093-supplement-01.pdf]
